# Supplementary material
Source: PubMed Central journal article supplement (PMC4749462)
Supplement: NIHMS727226-supplement-01.pdf [file NIHMS727226-supplement-01.pdf]

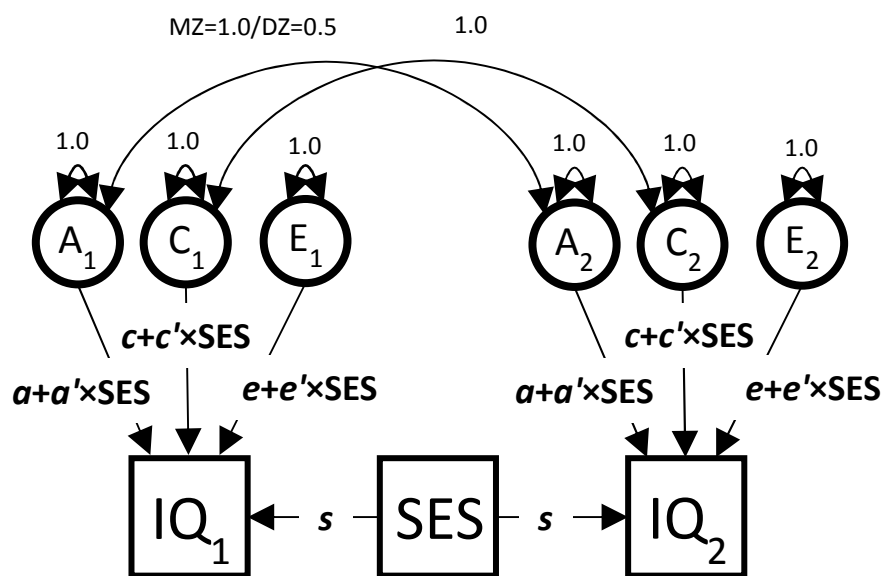

Figure S1. Structural equation model for estimating  $G \times SES$  interaction on IQ in twin data.

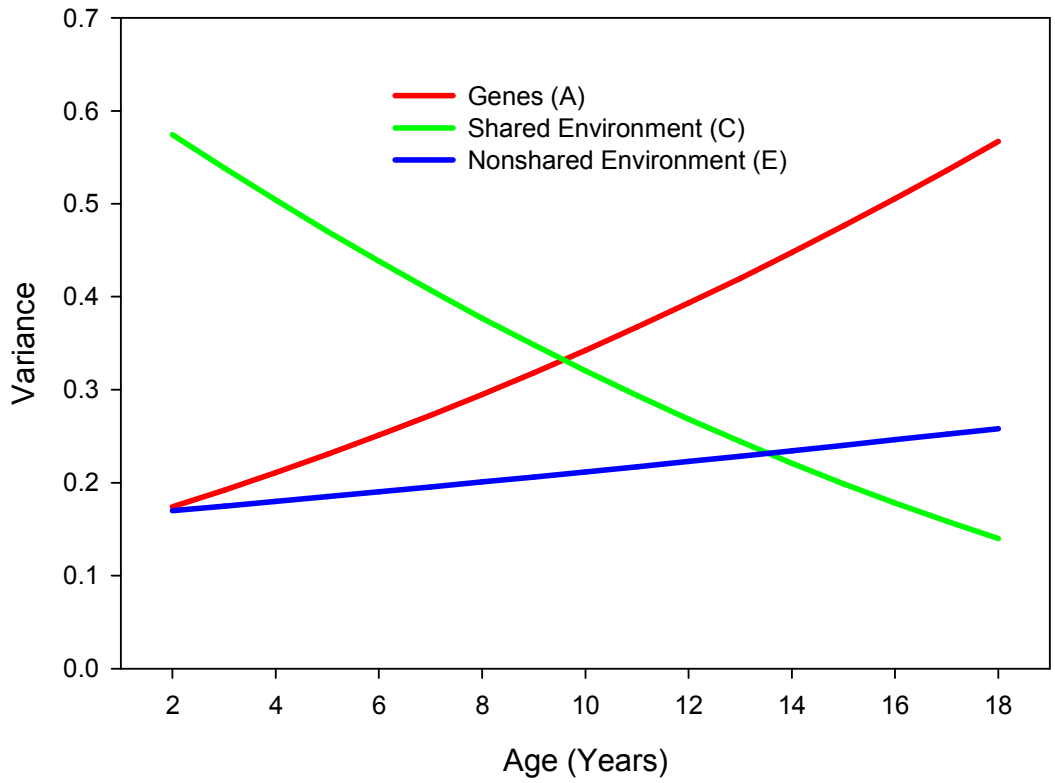

Figure S2. Age trends in genetic, shared environmental, and nonshared environmental variance in cognitive test performance.

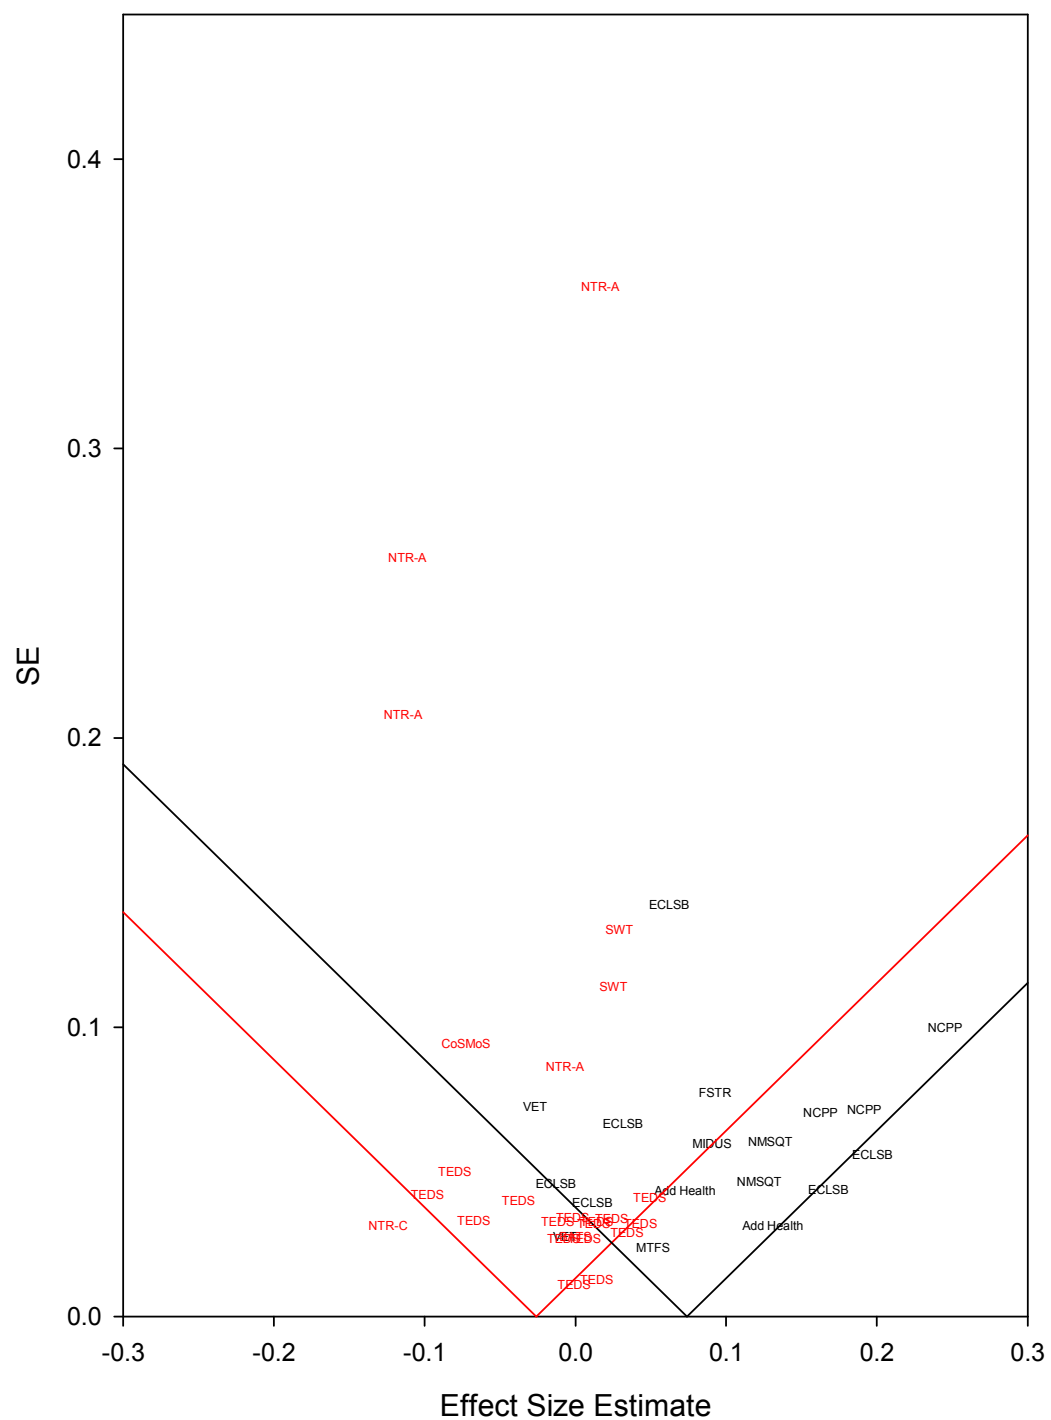

Figure S3. Funnel plot of Gene  $\times$  SES interaction effect sizes for US and Non-US Studies, with effect sizes represented by study acronyms (see Table 1).
